# Supplementary material for: Utility of KI-67 as a prognostic biomarker in pulmonary neuroendocrine neoplasms: a systematic review and meta-analysis
Source: HighWire-hosted journal article supplement (doi:10.1136/bmjopen-2020-041961), 2022-03-01
Supplement: bmjopen-2020-041961supp001_data_supplement.pdf [file bmjopen-2020-041961supp001_data_supplement.pdf]

**EXAMPLE OF FULL SEARCH STRATEGY**

The systematic review will employ the following search terms for Medline OVID, and EMBASE:

Ki-67 antigen/ OR (Ki67 or Ki-67 or mib-1 or mib1).mp.

AND

neuroendocrine tumors/ or carcinoid tumor/ or carcinoma, neuroendocrine/ OR small cell lung carcinoma/ OR ((tumo?r\* or neoplas\* or carcinoma or cancer\* or malignan\*) adj3 (neuroendocrine or carcinoid or small cell)).mp.
